# Supplementary material
Source: publisher site journal article supplement (https://www.dovepress.com/get_supplementary_file.php?f=454445.docx)
Supplement: Supplementary file 1 [file get_supplementary_file.php]

**
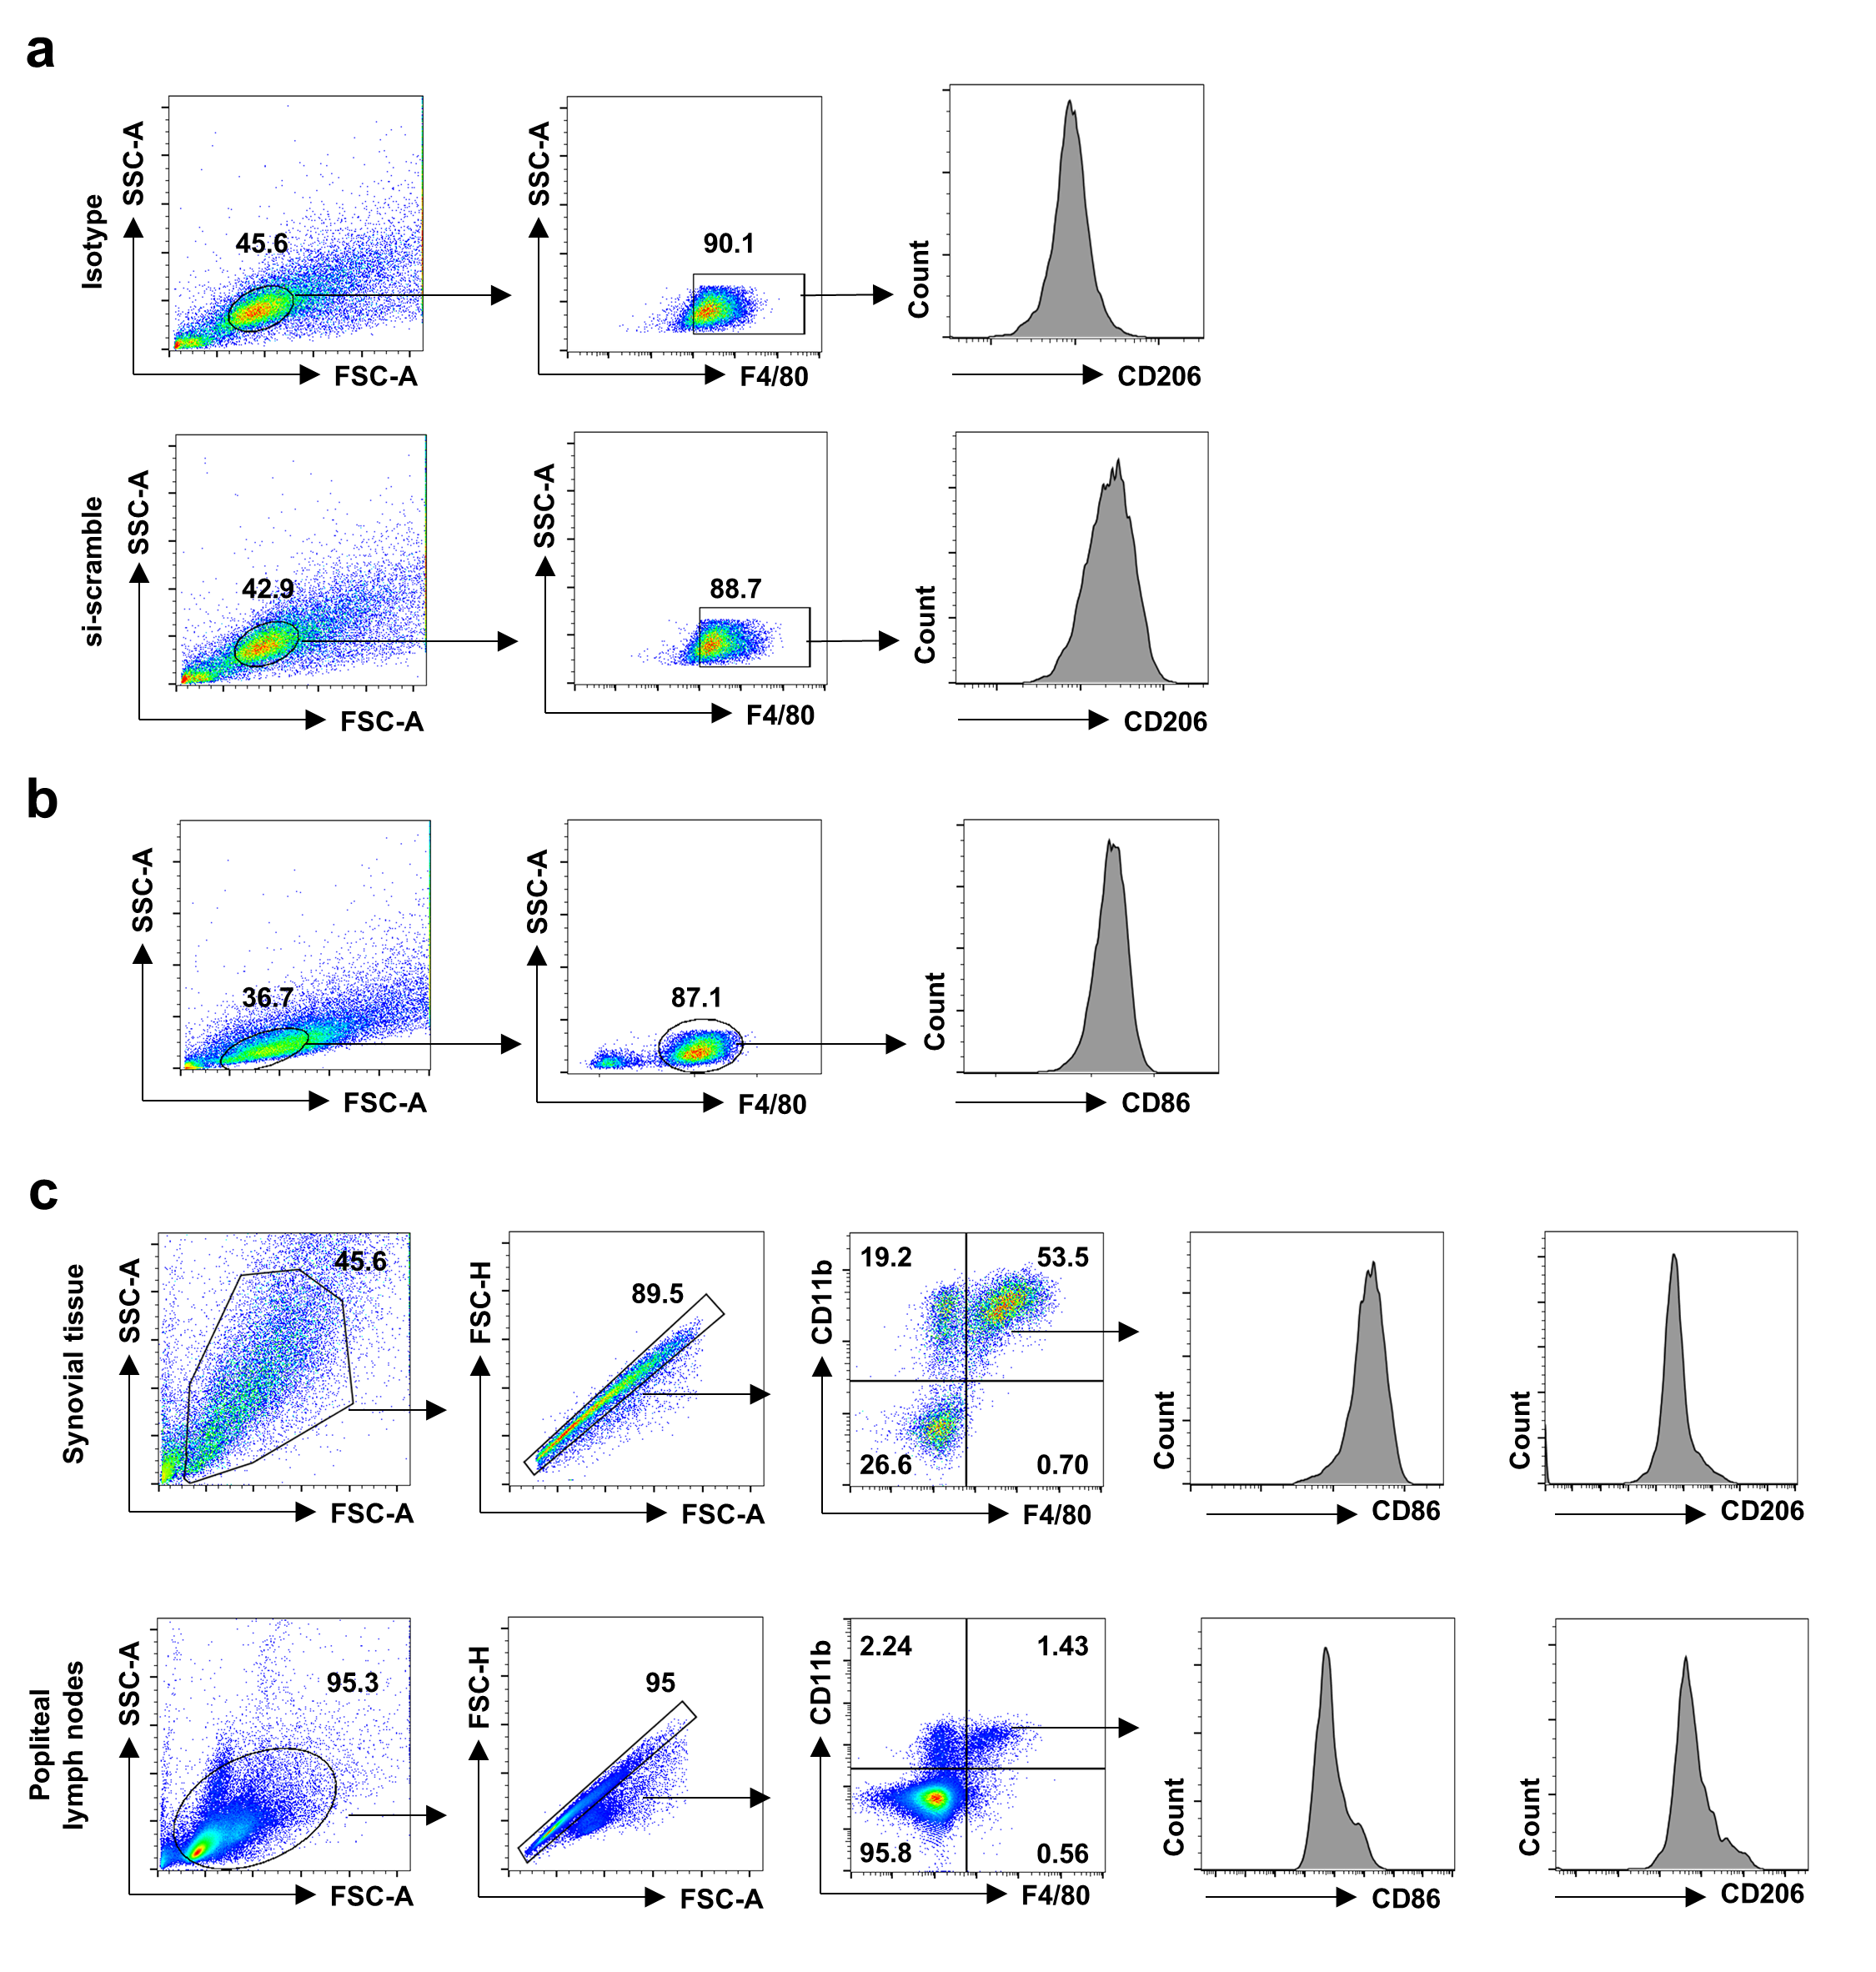
**

**Supplementary Figure 1. Gating strategy used for flow cytometry analysis.** Gating strategies for Fig. 2g (a), Fig. 2h (b), and Fig. 6 (c).


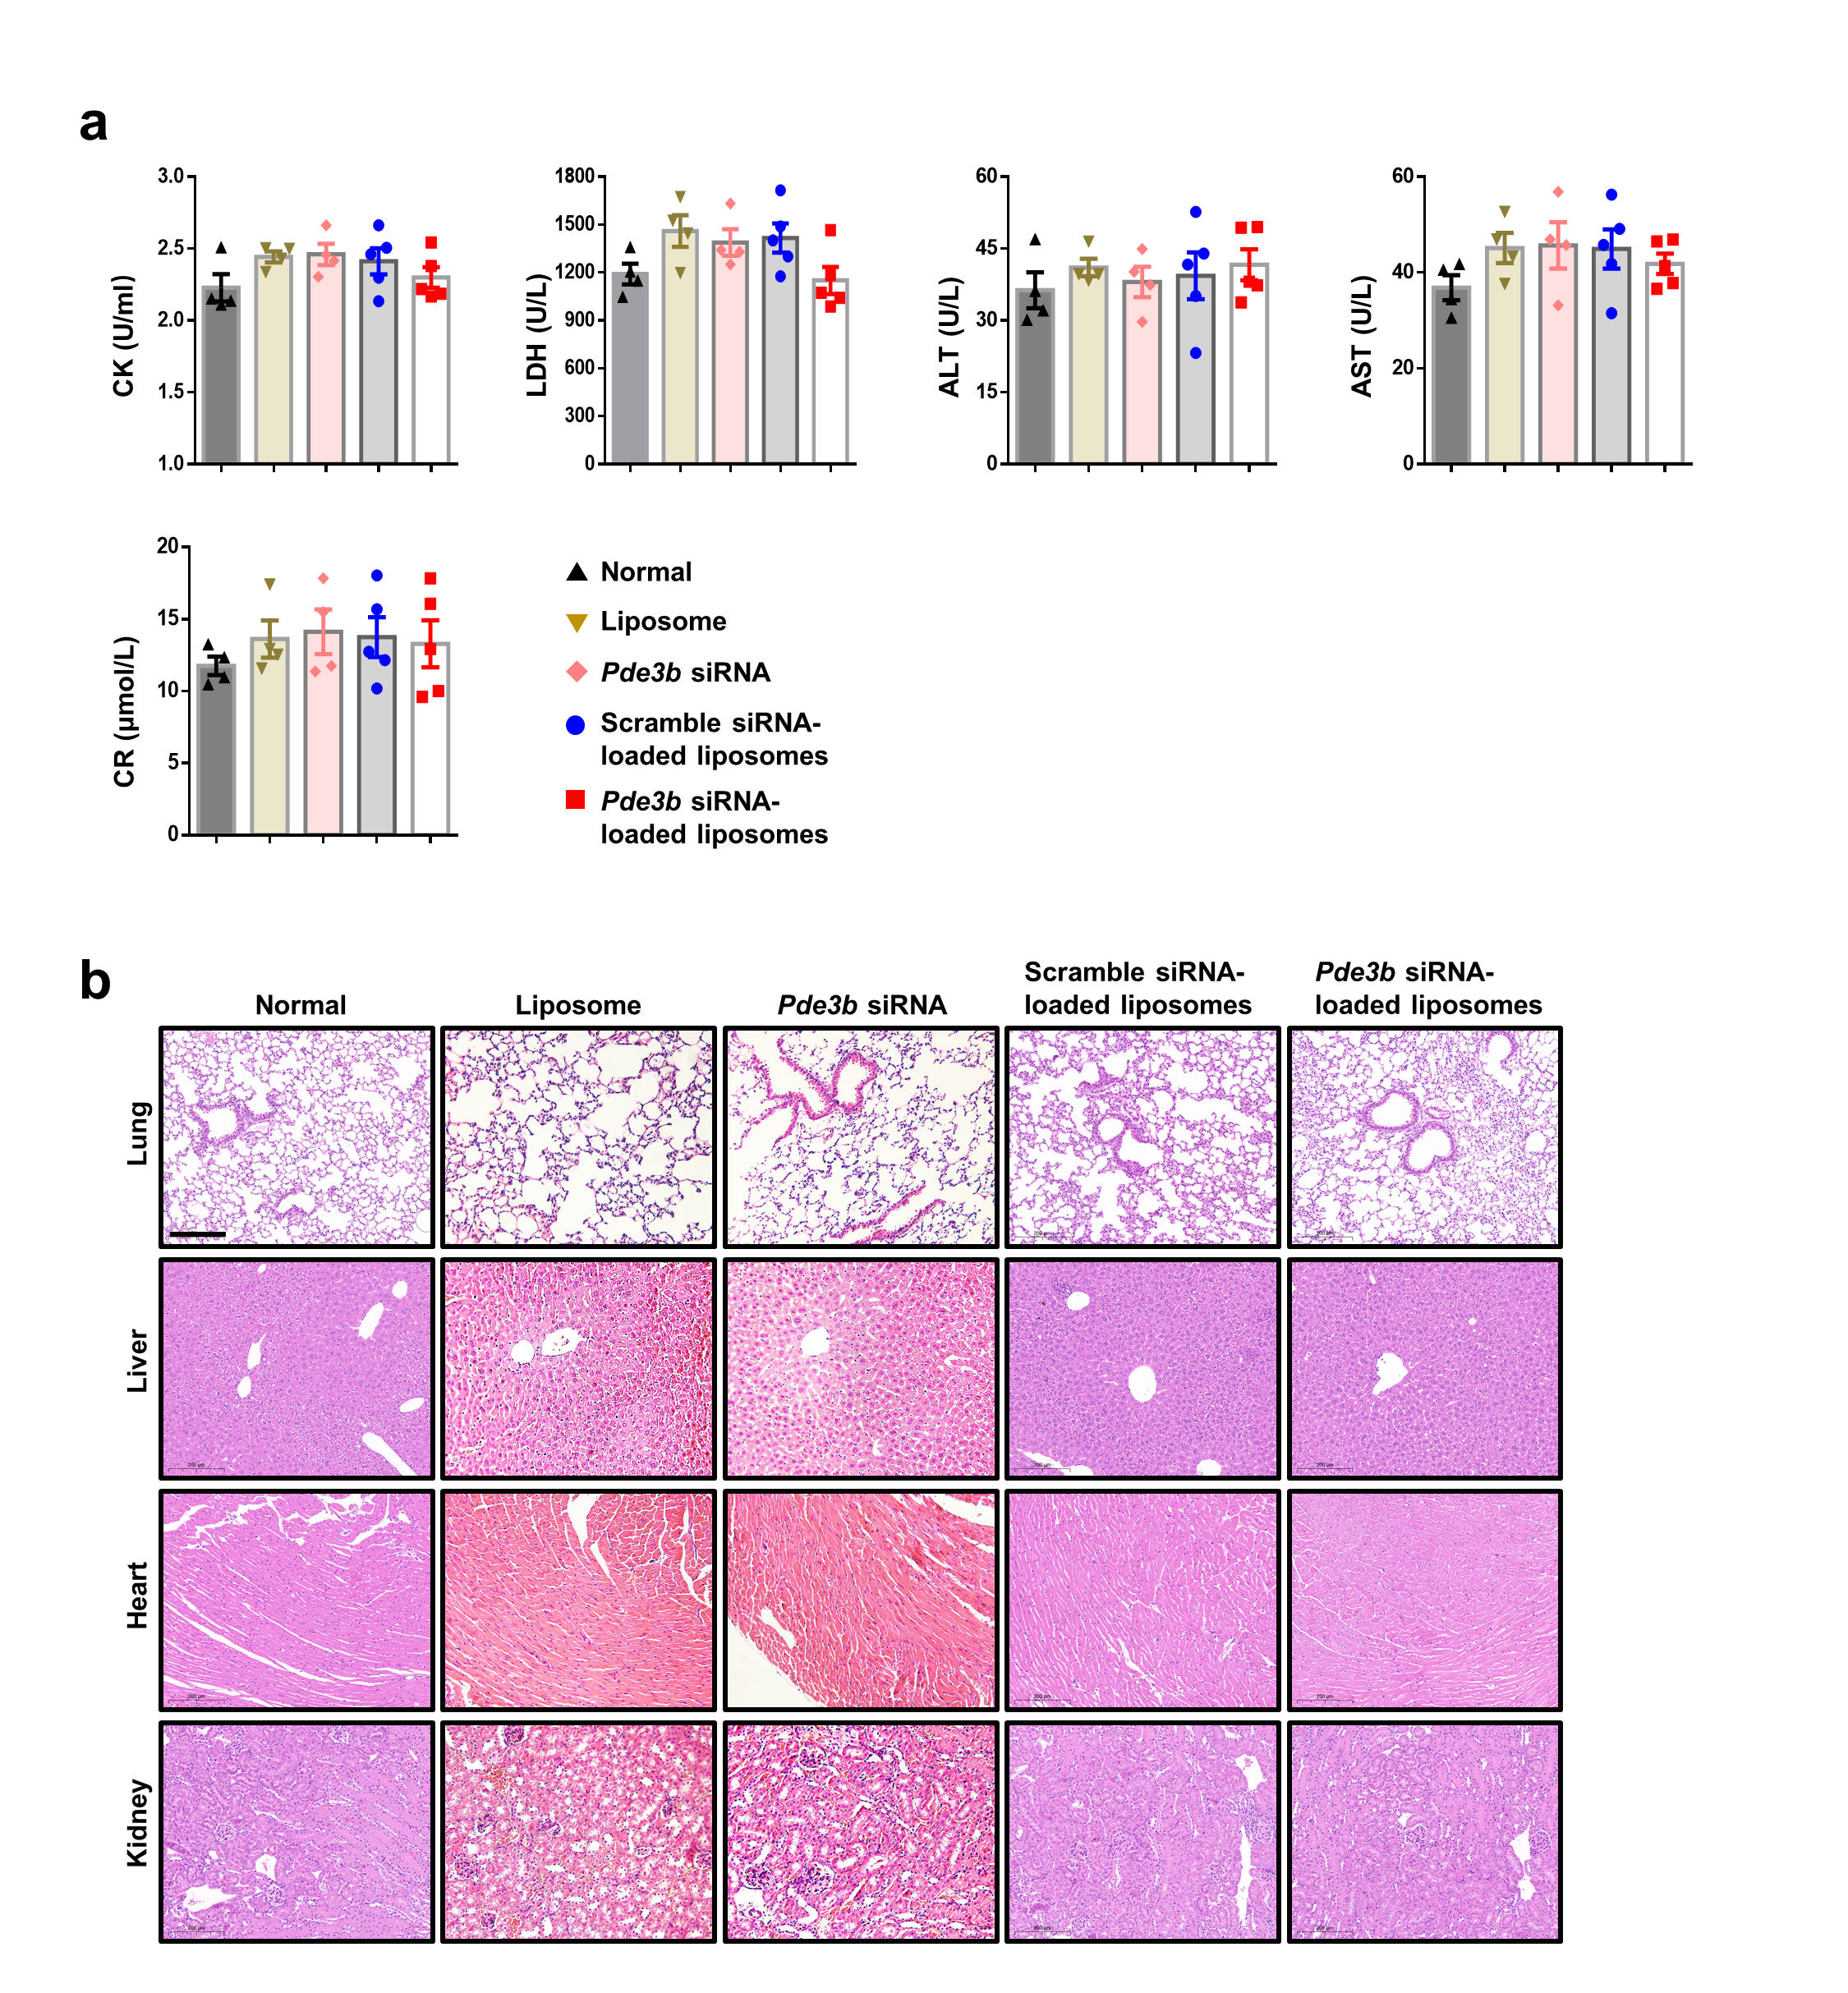


**Supplementary Figure 2. The safety of siRNA-loaded liposomes in vivo.** (a) Cardiac, liver, and renal function of normal mice (n = 4) and CIA mice after administration of siRNA (n = 4), blank liposomes (n = 4), or siRNA-loaded liposomes (n = 5 in each study group). (b) Representative H&E staining of lung, liver, heart, and kidney. Scale bars: 200 μm. Original magnification: ×200. Values are represented as mean ± SEM and one-way ANOVA was employed for statistical analysis. CK creatine kinase; LDH lactate dehydrogenase; ALT alanine aminotransferase; AST aspartate aminotransferase; CR creatinine.

**
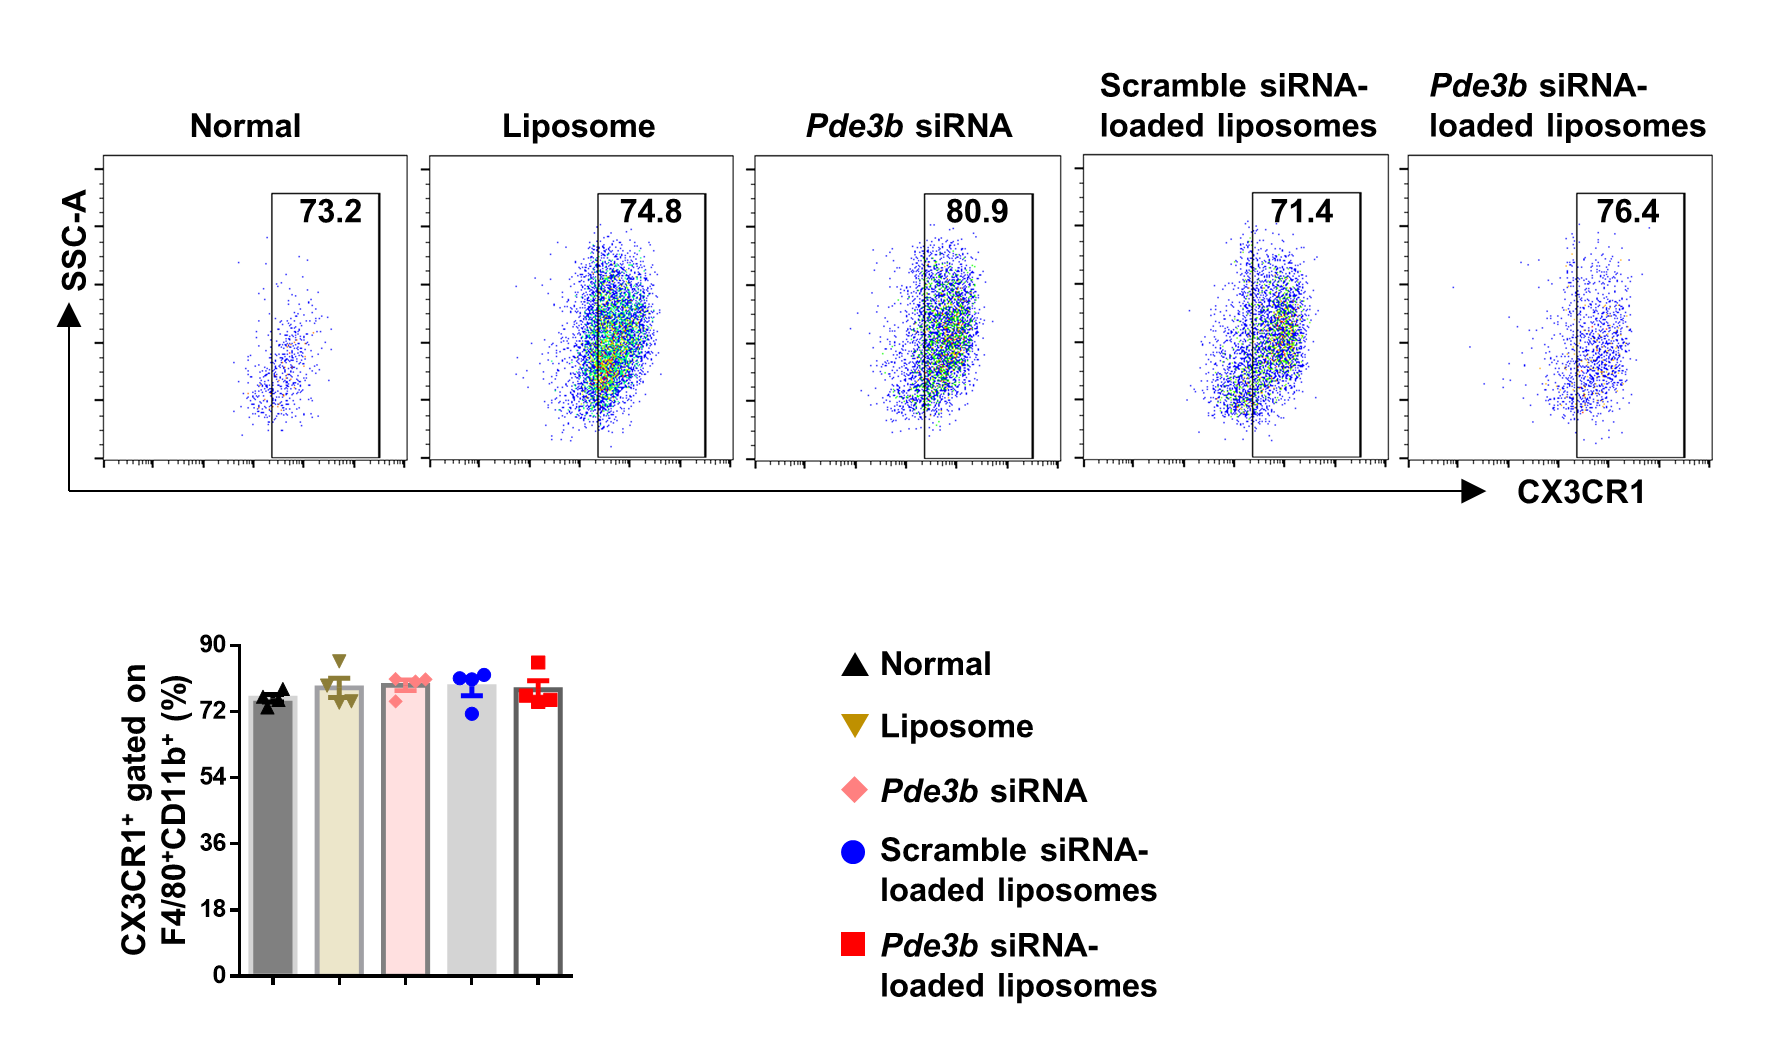
**

**Supplementary Figure 3.** Representative FACS plots and frequencies of CX3CR1+ macrophages in the synovial tissues. n = 4 in each study group. Values are represented as mean ± SEM and one-way ANOVA was employed for statistical analysis.

**Supplementary Table 1. Primer sequences for RT-qPCR**

| Gene | Forward (5’-3’) | Reverse (5’-3’) |
| --- | --- | --- |
| *Pde3b* | AAAGCGCAGCCGGTTACTAT | CACCACTGCTTCAAGTCCCAG |
| *Actb* | AGAGGGAAATCGTGCGTGAC | CAATAGTGATGACCTGGCCGT |
| *Arg1* | CTCCAAGCCAAAGTCCTTAGAG | AGGAGCTGTCATTAGGGACATC |
| *Retnla* | CTGGGTTCTCCACCTCTTCA | TGCTGGGATGACTGCTACTG |
| *Tnf* | GACGTGGAACTGGCAGAAGAG | TTGGTGGTTTGTGAGTGTGAG |
| *Il6* | CCAAGAGGTGAGTGCTTCCC | CTGTTGTTCAGACTCTCTCCCT |
| *Il1b* | GCAACTGTTCCTGAACTCAACT | ATCTTTTGGGGTCCGTCAACT |
| *Il17a* | TTTAACTCCCTTGGCGCAAAA | CTTTCCCTCCGCATTGACAC |

**Supplementary Table 2. Primer sequences for ChIP-qPCR**

| Site | Forward (5’-3’) | Reverse (5’-3’) |
| --- | --- | --- |
| Region 1 | GGCACACGACAAAGACAACTCATAT | GAAAGCATGGGGCTGGTTTTTGT |
| Region 2 | CCCCACTTGCTGTTTTAGCCTCAC | TCATCCGTCCAGTTCACACCCTT |
